# Supplementary material for: Development of an Accelerometer-Linked Online Intervention System to Promote Physical Activity in Adolescents
Source: PLoS One. 2015 May 26;10(5):e0128639. doi: 10.1371/journal.pone.0128639 (PMC4444279; doi:10.1371/journal.pone.0128639)
Supplement: S2 Dataset — (XLSX) [file pone.0128639.s003.xlsx]

## Sheet: RandomizedTrialData
ID	Female	HighBMI	StudySite	Condition	StudyWeek	Wear_min	MVPA_min	MVPA_percent
101	1	0	WV	Zamzee	1	562.17	7.4167	0.0108
101	1	0	WV	Zamzee	2	459.86	3.4722	0.00551
101	1	0	WV	Zamzee	3	136.62	2.4167	0.00508
101	1	0	WV	Zamzee	4	205.4	15.7917	0.04714
101	1	0	WV	Zamzee	5	275.36	3.6333	0.00751
101	1	0	WV	Zamzee	6	0	.	.
102	0	1	WV	DDRActiveControl	1	0	.	.
102	0	1	WV	DDRActiveControl	2	594.67	1.3571	0.00225
102	0	1	WV	DDRActiveControl	3	233.45	1.1111	0.00181
102	0	1	WV	DDRActiveControl	4	97.74	2.5	0.00952
102	0	1	WV	DDRActiveControl	5	29.95	1.6667	0.00795
102	0	1	WV	DDRActiveControl	6	280.36	1.8	0.00295
103	0	0	WV	DDRActiveControl	1	758.39	3.8333	0.00492
103	0	0	WV	DDRActiveControl	2	714.71	4.3333	0.00543
103	0	0	WV	DDRActiveControl	3	566.48	3.4444	0.00451
103	0	0	WV	DDRActiveControl	4	587.4	7.881	0.01159
103	0	0	WV	DDRActiveControl	5	122.52	4	0.00466
103	0	0	WV	DDRActiveControl	6	431.45	3.2222	0.00438
104	1	0	WV	PassiveControl	1	442.5	0.9583	0.00119
104	1	0	WV	PassiveControl	2	671.21	2.5952	0.00387
104	1	0	WV	PassiveControl	3	423.1	1.4444	0.0024
104	1	0	WV	PassiveControl	4	125.69	0.5833	0.00067
104	1	0	WV	PassiveControl	5	723.79	3.1905	0.00442
104	1	0	WV	PassiveControl	6	71.05	2.6667	0.00536
105	0	0	WV	Zamzee	1	479.69	38.3333	0.052
105	0	0	WV	Zamzee	2	711.4	24.1667	0.03733
105	0	0	WV	Zamzee	3	679.05	25	0.03726
105	0	0	WV	Zamzee	4	565.57	25.4286	0.03662
105	0	0	WV	Zamzee	5	451.76	22.0714	0.05731
105	0	0	WV	Zamzee	6	624.55	15.9167	0.02353
107	0	0	WV	DDRActiveControl	1	143.97	0.625	0.00167
107	0	0	WV	DDRActiveControl	2	13.71	0	0
107	0	0	WV	DDRActiveControl	3	0	.	.
107	0	0	WV	DDRActiveControl	4	0	.	.
107	0	0	WV	DDRActiveControl	5	0	.	.
107	0	0	WV	DDRActiveControl	6	0	.	.
108	0	1	WV	DDRActiveControl	1	547.06	1.2333	0.00175
108	0	1	WV	DDRActiveControl	2	473.74	2.1667	0.0063
108	0	1	WV	DDRActiveControl	3	155.95	1.1667	0.00269
108	0	1	WV	DDRActiveControl	4	140.69	0	0
108	0	1	WV	DDRActiveControl	5	0	.	.
108	0	1	WV	DDRActiveControl	6	0	.	.
110	0	0	WV	PassiveControl	1	0	.	.
110	0	0	WV	PassiveControl	2	504.33	2	0.00354
110	0	0	WV	PassiveControl	3	261.79	1.6	0.00404
110	0	0	WV	PassiveControl	4	454.62	3.5	0.00601
110	0	0	WV	PassiveControl	5	104.17	5	0.00686
110	0	0	WV	PassiveControl	6	1.52	0	0
112	1	0	WV	PassiveControl	1	523.25	2.9667	0.00486
112	1	0	WV	PassiveControl	2	363.26	2.0833	0.00259
112	1	0	WV	PassiveControl	3	0	.	.
112	1	0	WV	PassiveControl	4	0	.	.
112	1	0	WV	PassiveControl	5	0	.	.
112	1	0	WV	PassiveControl	6	285.38	0.9722	0.00207
113	0	0	WV	DDRActiveControl	1	836.36	9.7778	0.01184
113	0	0	WV	DDRActiveControl	2	101.43	1	0.00141
113	0	0	WV	DDRActiveControl	3	0	.	.
113	0	0	WV	DDRActiveControl	4	0	.	.
113	0	0	WV	DDRActiveControl	5	0	.	.
113	0	0	WV	DDRActiveControl	6	0	.	.
114	0	0	WV	PassiveControl	1	437.83	5.5667	0.00998
114	0	0	WV	PassiveControl	2	610.36	8.2381	0.01266
114	0	0	WV	PassiveControl	3	653.69	7.8333	0.01158
114	0	0	WV	PassiveControl	4	331	1.3333	0.00164
114	0	0	WV	PassiveControl	5	425.95	2.4722	0.00397
114	0	0	WV	PassiveControl	6	611.36	6.119	0.00873
115	0	0	WV	Zamzee	1	759.81	27.8056	0.03628
115	0	0	WV	Zamzee	2	799.6	20.7619	0.02764
115	0	0	WV	Zamzee	3	619.76	18.3095	0.02671
115	0	0	WV	Zamzee	4	441.79	31.7667	0.04739
115	0	0	WV	Zamzee	5	520.83	54.7143	0.12326
115	0	0	WV	Zamzee	6	718.48	21.5476	0.03555
116	1	0	WV	DDRActiveControl	1	529	0.7778	0.00173
116	1	0	WV	DDRActiveControl	2	475.83	1.4048	0.00284
116	1	0	WV	DDRActiveControl	3	10.07	0.0833	0.00299
116	1	0	WV	DDRActiveControl	4	46.31	0.5833	0.00195
116	1	0	WV	DDRActiveControl	5	0	.	.
116	1	0	WV	DDRActiveControl	6	0	.	.
117	0	0	WV	Zamzee	1	622.92	17.3889	0.02951
117	0	0	WV	Zamzee	2	640	16.4762	0.02563
117	0	0	WV	Zamzee	3	569.48	9.4286	0.02031
117	0	0	WV	Zamzee	4	147.67	10.875	0.04001
117	0	0	WV	Zamzee	5	573.6	9.8889	0.01399
117	0	0	WV	Zamzee	6	306.69	12.3611	0.04449
118	1	0	WV	Zamzee	1	209.33	9.6667	0.08695
118	1	0	WV	Zamzee	2	57.02	0	0
118	1	0	WV	Zamzee	3	178.67	14.5833	0.0232
118	1	0	WV	Zamzee	4	413.24	11.2222	0.02557
118	1	0	WV	Zamzee	5	582.24	22.6667	0.02419
118	1	0	WV	Zamzee	6	377.17	6	0.01231
119	1	0	WV	Zamzee	1	568.03	5.9667	0.00802
119	1	0	WV	Zamzee	2	472.36	5.7333	0.00922
119	1	0	WV	Zamzee	3	342.6	6.2619	0.02639
119	1	0	WV	Zamzee	4	232	4.1111	0.0076
119	1	0	WV	Zamzee	5	269.9	2.4583	0.00428
119	1	0	WV	Zamzee	6	222.05	5.125	0.01793
120	1	0	WV	Zamzee	1	273.28	3.2778	0.0052
120	1	0	WV	Zamzee	2	0	.	.
120	1	0	WV	Zamzee	3	0	.	.
120	1	0	WV	Zamzee	4	0	.	.
120	1	0	WV	Zamzee	5	0	.	.
120	1	0	WV	Zamzee	6	0	.	.
121	0	0	WV	DDRActiveControl	1	0	.	.
121	0	0	WV	DDRActiveControl	2	91.45	0.0833	0.00019
121	0	0	WV	DDRActiveControl	3	784.98	1.2143	0.00153
121	0	0	WV	DDRActiveControl	4	0	.	.
121	0	0	WV	DDRActiveControl	5	0	.	.
121	0	0	WV	DDRActiveControl	6	0	.	.
123	0	0	WV	PassiveControl	1	12.64	0.5	0.00659
123	0	0	WV	PassiveControl	2	0	.	.
123	0	0	WV	PassiveControl	3	0	.	.
123	0	0	WV	PassiveControl	4	0	.	.
123	0	0	WV	PassiveControl	5	0	.	.
123	0	0	WV	PassiveControl	6	0	.	.
129	1	0	WV	Zamzee	1	138.22	1.0833	0.00688
129	1	0	WV	Zamzee	2	577.57	4.0556	0.03164
129	1	0	WV	Zamzee	3	773.45	6.3333	0.00913
129	1	0	WV	Zamzee	4	660.33	1.3333	0.00209
129	1	0	WV	Zamzee	5	672.45	1.1944	0.00152
129	1	0	WV	Zamzee	6	0	.	.
131	1	0	WV	Zamzee	1	9.64	0	0
131	1	0	WV	Zamzee	2	0	.	.
131	1	0	WV	Zamzee	3	0	.	.
131	1	0	WV	Zamzee	4	0	.	.
131	1	0	WV	Zamzee	5	0	.	.
131	1	0	WV	Zamzee	6	0	.	.
132	0	0	WV	PassiveControl	1	611.92	3.8611	0.00631
132	0	0	WV	PassiveControl	2	515.52	2.9286	0.00622
132	0	0	WV	PassiveControl	3	211.17	1.4333	0.00429
132	0	0	WV	PassiveControl	4	239.79	0.5278	0.00153
132	0	0	WV	PassiveControl	5	455.9	2.5667	0.00411
132	0	0	WV	PassiveControl	6	88.67	1.5833	0.00534
134	1	0	WV	DDRActiveControl	1	339.92	5.3611	0.01754
134	1	0	WV	DDRActiveControl	2	563.31	5.1905	0.00808
134	1	0	WV	DDRActiveControl	3	645.29	4.6667	0.00778
134	1	0	WV	DDRActiveControl	4	551.76	3.7381	0.00571
134	1	0	WV	DDRActiveControl	5	370.83	7.0833	0.01008
134	1	0	WV	DDRActiveControl	6	0	.	.
135	0	0	WV	PassiveControl	1	279.14	1.8056	0.00415
135	0	0	WV	PassiveControl	2	227.05	8.9167	0.01203
135	0	0	WV	PassiveControl	3	677.05	4.619	0.00709
135	0	0	WV	PassiveControl	4	725.29	4.9286	0.00584
135	0	0	WV	PassiveControl	5	557.24	3.3333	0.00532
135	0	0	WV	PassiveControl	6	585.76	4.4524	0.0063
136	0	0	WV	Zamzee	1	679	7.75	0.0135
136	0	0	WV	Zamzee	2	641.67	2.619	0.00443
136	0	0	WV	Zamzee	3	518.74	3.4167	0.00489
136	0	0	WV	Zamzee	4	375.1	5.4333	0.01227
136	0	0	WV	Zamzee	5	201.6	22.1667	0.04533
136	0	0	WV	Zamzee	6	177.19	5.5	0.01029
137	1	0	WV	DDRActiveControl	1	2.53	0	0
137	1	0	WV	DDRActiveControl	2	0	.	.
137	1	0	WV	DDRActiveControl	3	0	.	.
137	1	0	WV	DDRActiveControl	4	0	.	.
137	1	0	WV	DDRActiveControl	5	0	.	.
137	1	0	WV	DDRActiveControl	6	0	.	.
138	0	0	WV	DDRActiveControl	1	0	.	.
138	0	0	WV	DDRActiveControl	2	336.71	4.375	0.00651
138	0	0	WV	DDRActiveControl	3	761.62	4.0476	0.0052
138	0	0	WV	DDRActiveControl	4	728.43	7.4286	0.00925
138	0	0	WV	DDRActiveControl	5	598.26	7.4333	0.00875
138	0	0	WV	DDRActiveControl	6	294.29	8.2222	0.01137
139	1	1	WV	Zamzee	1	554.78	8.5278	0.01748
139	1	1	WV	Zamzee	2	486.38	5	0.01362
139	1	1	WV	Zamzee	3	432.6	1.6667	0.00275
139	1	1	WV	Zamzee	4	364.45	2.25	0.00419
139	1	1	WV	Zamzee	5	250	2.2083	0.0043
139	1	1	WV	Zamzee	6	349.57	1.9	0.0038
141	1	0	WV	DDRActiveControl	1	553.53	2.8611	0.00585
141	1	0	WV	DDRActiveControl	2	567.5	6.3095	0.0095
141	1	0	WV	DDRActiveControl	3	696.1	4.4286	0.00831
141	1	0	WV	DDRActiveControl	4	163.4	3.5	0.00667
141	1	0	WV	DDRActiveControl	5	62.31	3	0.00688
141	1	0	WV	DDRActiveControl	6	162.07	3.5	0.00612
142	1	0	WV	PassiveControl	1	618.28	6.6944	0.00897
142	1	0	WV	PassiveControl	2	703.69	12.5	0.01782
142	1	0	WV	PassiveControl	3	652.36	2.2619	0.00317
142	1	0	WV	PassiveControl	4	769.55	2.881	0.00375
142	1	0	WV	PassiveControl	5	753.9	5.9048	0.0081
142	1	0	WV	PassiveControl	6	787.52	3.5238	0.00445
145	1	0	WV	DDRActiveControl	1	347.72	0	0
145	1	0	WV	DDRActiveControl	2	133.48	0	0
145	1	0	WV	DDRActiveControl	3	0	.	.
145	1	0	WV	DDRActiveControl	4	0	.	.
145	1	0	WV	DDRActiveControl	5	0	.	.
145	1	0	WV	DDRActiveControl	6	0	.	.
146	1	0	WV	PassiveControl	1	403.08	19.2333	0.04356
146	1	0	WV	PassiveControl	2	440.31	10.9722	0.01574
146	1	0	WV	PassiveControl	3	487.93	3.0238	0.00966
146	1	0	WV	PassiveControl	4	381.6	7.25	0.00934
146	1	0	WV	PassiveControl	5	0	.	.
146	1	0	WV	PassiveControl	6	0	.	.
148	0	1	WV	PassiveControl	1	606.81	1.75	0.00275
148	0	1	WV	PassiveControl	2	578.71	1.619	0.00263
148	0	1	WV	PassiveControl	3	560.64	0.8333	0.0012
148	0	1	WV	PassiveControl	4	429.71	0.7619	0.0014
148	0	1	WV	PassiveControl	5	516.14	0.6905	0.00153
148	0	1	WV	PassiveControl	6	658.07	1.4524	0.00205
152	1	0	WV	DDRActiveControl	1	643.69	14.2778	0.02425
152	1	0	WV	DDRActiveControl	2	315.86	19.2083	0.03137
152	1	0	WV	DDRActiveControl	3	0	.	.
152	1	0	WV	DDRActiveControl	4	0	.	.
152	1	0	WV	DDRActiveControl	5	0	.	.
152	1	0	WV	DDRActiveControl	6	0	.	.
153	1	0	WV	Zamzee	1	648.19	1.6944	0.00265
153	1	0	WV	Zamzee	2	71.17	0	0
153	1	0	WV	Zamzee	3	0	.	.
153	1	0	WV	Zamzee	4	0	.	.
153	1	0	WV	Zamzee	5	0	.	.
153	1	0	WV	Zamzee	6	0	.	.
157	1	0	WV	Zamzee	1	467.92	4.75	0.01363
157	1	0	WV	Zamzee	2	641.93	12.2381	0.01922
157	1	0	WV	Zamzee	3	682.55	5.3095	0.00839
157	1	0	WV	Zamzee	4	706.9	0.9762	0.00135
157	1	0	WV	Zamzee	5	581.38	4.881	0.00902
157	1	0	WV	Zamzee	6	531.67	1.6429	0.00391
158	1	1	WV	Zamzee	1	452	1.0556	0.00187
158	1	1	WV	Zamzee	2	206.43	0.4667	0.00101
158	1	1	WV	Zamzee	3	71.33	2.1667	0.00618
158	1	1	WV	Zamzee	4	0	.	.
158	1	1	WV	Zamzee	5	0	.	.
158	1	1	WV	Zamzee	6	83.55	0.5	0.00178
162	0	0	WV	PassiveControl	1	565.58	3.2222	0.00553
162	0	0	WV	PassiveControl	2	509.76	0.7222	0.00115
162	0	0	WV	PassiveControl	3	495.55	0.5833	0.00096
162	0	0	WV	PassiveControl	4	313.95	3.3333	0.0055
162	0	0	WV	PassiveControl	5	623.57	6.1111	0.00916
162	0	0	WV	PassiveControl	6	662.5	8.619	0.01198
164	1	0	WV	PassiveControl	1	0	.	.
164	1	0	WV	PassiveControl	2	0	.	.
164	1	0	WV	PassiveControl	3	0	.	.
164	1	0	WV	PassiveControl	4	0	.	.
164	1	0	WV	PassiveControl	5	0	.	.
164	1	0	WV	PassiveControl	6	0	.	.
165	1	0	WV	DDRActiveControl	1	54.92	3	0.0091
165	1	0	WV	DDRActiveControl	2	26.43	0.1667	0.0009
165	1	0	WV	DDRActiveControl	3	0	.	.
165	1	0	WV	DDRActiveControl	4	156.95	0.5833	0.00108
165	1	0	WV	DDRActiveControl	5	0	.	.
165	1	0	WV	DDRActiveControl	6	0	.	.
166	0	0	WV	DDRActiveControl	1	800.53	3.3889	0.0037
166	0	0	WV	DDRActiveControl	2	456.33	3.0833	0.00405
166	0	0	WV	DDRActiveControl	3	532	2.4444	0.00401
166	0	0	WV	DDRActiveControl	4	698.57	3.7381	0.0039
166	0	0	WV	DDRActiveControl	5	787.79	4.2619	0.00522
166	0	0	WV	DDRActiveControl	6	383.12	0.4444	0.00044
169	1	0	WV	Zamzee	1	745.08	3.6944	0.00437
169	1	0	WV	Zamzee	2	567.81	3.8571	0.00456
169	1	0	WV	Zamzee	3	250.62	2.4444	0.0041
169	1	0	WV	Zamzee	4	164.69	0.8333	0.00168
169	1	0	WV	Zamzee	5	434.4	4.7333	0.00635
169	1	0	WV	Zamzee	6	0	.	.
170	1	0	WV	DDRActiveControl	1	44.58	1.6667	0.00623
170	1	0	WV	DDRActiveControl	2	307.86	1.3333	0.00173
170	1	0	WV	DDRActiveControl	3	520.98	2.2222	0.0031
170	1	0	WV	DDRActiveControl	4	435.71	2.9	0.00415
170	1	0	WV	DDRActiveControl	5	610.02	2.2143	0.00388
170	1	0	WV	DDRActiveControl	6	91.02	2	0.00314
174	0	0	WV	PassiveControl	1	642.94	7	0.0097
174	0	0	WV	PassiveControl	2	709.45	29.9762	0.04287
174	0	0	WV	PassiveControl	3	528.95	31.0833	0.03065
174	0	0	WV	PassiveControl	4	595	23.8095	0.0353
174	0	0	WV	PassiveControl	5	532.24	4.1905	0.00677
174	0	0	WV	PassiveControl	6	628.52	6.1905	0.00976
175	1	0	WV	DDRActiveControl	1	7.58	0.1667	0.00366
175	1	0	WV	DDRActiveControl	2	0	.	.
175	1	0	WV	DDRActiveControl	3	0	.	.
175	1	0	WV	DDRActiveControl	4	0	.	.
175	1	0	WV	DDRActiveControl	5	0	.	.
175	1	0	WV	DDRActiveControl	6	0	.	.
176	0	0	WV	Zamzee	1	132.81	7.75	0.01488
176	0	0	WV	Zamzee	2	205.31	3.2917	0.00619
176	0	0	WV	Zamzee	3	205.29	0.5833	0.00091
176	0	0	WV	Zamzee	4	0	.	.
176	0	0	WV	Zamzee	5	0	.	.
176	0	0	WV	Zamzee	6	194.24	4.4444	0.00704
179	0	0	WV	PassiveControl	1	319.44	5.7333	0.01042
179	0	0	WV	PassiveControl	2	446.02	8.9167	0.01417
179	0	0	WV	PassiveControl	3	297.57	7.125	0.01083
179	0	0	WV	PassiveControl	4	571.1	7.1667	0.00974
179	0	0	WV	PassiveControl	5	453.38	0.4762	0.00085
179	0	0	WV	PassiveControl	6	567.29	2.9048	0.00445
180	1	0	WV	PassiveControl	1	798.17	6.2222	0.00712
180	1	0	WV	PassiveControl	2	576.21	4.381	0.00664
180	1	0	WV	PassiveControl	3	439.52	0.3333	0.00084
180	1	0	WV	PassiveControl	4	455.12	1.5333	0.00206
180	1	0	WV	PassiveControl	5	153.83	0.6667	0.00079
180	1	0	WV	PassiveControl	6	514.07	0.5238	0.00082
181	0	0	WV	Zamzee	1	633.31	10.2778	0.01731
181	0	0	WV	Zamzee	2	97.36	1.4167	0.00445
181	0	0	WV	Zamzee	3	0	.	.
181	0	0	WV	Zamzee	4	0	.	.
181	0	0	WV	Zamzee	5	0	.	.
181	0	0	WV	Zamzee	6	0	.	.
183	1	0	WV	PassiveControl	1	6.94	0.1667	0.004
183	1	0	WV	PassiveControl	2	300.9	3.75	0.00604
183	1	0	WV	PassiveControl	3	568.69	3.9524	0.00986
183	1	0	WV	PassiveControl	4	645.86	17.5476	0.03559
183	1	0	WV	PassiveControl	5	700.26	16.8095	0.0249
183	1	0	WV	PassiveControl	6	439.07	11.5278	0.02894
186	0	0	WV	PassiveControl	1	0	.	.
186	0	0	WV	PassiveControl	2	0	.	.
186	0	0	WV	PassiveControl	3	299.12	26.5	0.03537
186	0	0	WV	PassiveControl	4	191.33	9.4048	0.00913
186	0	0	WV	PassiveControl	5	0	.	.
186	0	0	WV	PassiveControl	6	0	.	.
188	0	0	WV	Zamzee	1	0	.	.
188	0	0	WV	Zamzee	2	0	.	.
188	0	0	WV	Zamzee	3	0	.	.
188	0	0	WV	Zamzee	4	0	.	.
188	0	0	WV	Zamzee	5	0	.	.
188	0	0	WV	Zamzee	6	0	.	.
189	0	0	WV	PassiveControl	1	0	.	.
189	0	0	WV	PassiveControl	2	455.12	5.5667	0.00897
189	0	0	WV	PassiveControl	3	270.12	5.3333	0.00947
189	0	0	WV	PassiveControl	4	0	.	.
189	0	0	WV	PassiveControl	5	188.93	5.25	0.00883
189	0	0	WV	PassiveControl	6	0	.	.
190	0	1	WV	DDRActiveControl	1	204.14	0.9444	0.00156
190	0	1	WV	DDRActiveControl	2	564.45	1.2381	0.00218
190	0	1	WV	DDRActiveControl	3	582.64	0.4286	0.00074
190	0	1	WV	DDRActiveControl	4	264.29	0.2917	0.00043
190	0	1	WV	DDRActiveControl	5	128.17	0.0556	9e-05
190	0	1	WV	DDRActiveControl	6	0	.	.
191	1	0	WV	Zamzee	1	0	.	.
191	1	0	WV	Zamzee	2	435.17	2.3333	0.00376
191	1	0	WV	Zamzee	3	327.83	1.2619	0.00263
191	1	0	WV	Zamzee	4	0	.	.
191	1	0	WV	Zamzee	5	297.19	2.1667	0.00273
191	1	0	WV	Zamzee	6	228.5	0.2778	0.00053
193	0	0	WV	PassiveControl	1	791.58	5.1111	0.00656
193	0	0	WV	PassiveControl	2	187	1.7083	0.00376
193	0	0	WV	PassiveControl	3	496.19	3.119	0.00608
193	0	0	WV	PassiveControl	4	602.21	2.1667	0.00302
193	0	0	WV	PassiveControl	5	314.29	0.6667	0.00096
193	0	0	WV	PassiveControl	6	390.21	2.4048	0.00408
194	1	0	WV	DDRActiveControl	1	1059.39	3.0556	0.00291
194	1	0	WV	DDRActiveControl	2	849.17	1.619	0.00194
194	1	0	WV	DDRActiveControl	3	854.67	3.2857	0.00351
194	1	0	WV	DDRActiveControl	4	869.93	2.619	0.00307
194	1	0	WV	DDRActiveControl	5	783.55	0.9286	0.00122
194	1	0	WV	DDRActiveControl	6	175.4	0.6667	0.00104
195	1	0	WV	PassiveControl	1	566.25	8.2333	0.00952
195	1	0	WV	PassiveControl	2	546.05	4.5833	0.00608
195	1	0	WV	PassiveControl	3	682.14	1.0952	0.00212
195	1	0	WV	PassiveControl	4	564.4	0.3333	0.00054
195	1	0	WV	PassiveControl	5	348	0.9048	0.00236
195	1	0	WV	PassiveControl	6	722.24	2.0238	0.00243
196	1	0	WV	DDRActiveControl	1	116.31	0.1667	0.00024
196	1	0	WV	DDRActiveControl	2	0	.	.
196	1	0	WV	DDRActiveControl	3	0	.	.
196	1	0	WV	DDRActiveControl	4	0	.	.
196	1	0	WV	DDRActiveControl	5	319.38	13.0833	0.01837
196	1	0	WV	DDRActiveControl	6	533.74	5.3095	0.01016
198	0	0	WV	Zamzee	1	154.61	2	0.00618
198	0	0	WV	Zamzee	2	84.07	10.2	0.05735
198	0	0	WV	Zamzee	3	0	.	.
198	0	0	WV	Zamzee	4	233.88	4.2222	0.00741
198	0	0	WV	Zamzee	5	0	.	.
198	0	0	WV	Zamzee	6	0	.	.
201	0	0	SD	Zamzee	1	532.5	6.0556	0.01019
201	0	0	SD	Zamzee	2	634.19	5.4286	0.00835
201	0	0	SD	Zamzee	3	486.4	3.5714	0.00658
201	0	0	SD	Zamzee	4	611.67	4.5238	0.00726
201	0	0	SD	Zamzee	5	625.12	3.5238	0.00553
201	0	0	SD	Zamzee	6	516.71	4.6429	0.00777
204	0	1	SD	DDRActiveControl	1	608.25	5.9722	0.00865
204	0	1	SD	DDRActiveControl	2	549.26	8.8611	0.01258
204	0	1	SD	DDRActiveControl	3	460.69	7.1667	0.01506
204	0	1	SD	DDRActiveControl	4	0	.	.
204	0	1	SD	DDRActiveControl	5	0	.	.
204	0	1	SD	DDRActiveControl	6	0	.	.
205	1	0	SD	Zamzee	1	371.11	6	0.01486
205	1	0	SD	Zamzee	2	271.88	2.8333	0.00507
205	1	0	SD	Zamzee	3	257.17	3.1667	0.00573
205	1	0	SD	Zamzee	4	133.29	0	0
205	1	0	SD	Zamzee	5	307.81	0	0
205	1	0	SD	Zamzee	6	342.64	4.7083	0.01128
206	1	0	SD	PassiveControl	1	544.67	3.1389	0.00681
206	1	0	SD	PassiveControl	2	452.26	3.3571	0.00456
206	1	0	SD	PassiveControl	3	526.74	4.0476	0.00619
206	1	0	SD	PassiveControl	4	240.5	1.0417	0.00236
206	1	0	SD	PassiveControl	5	0	.	.
206	1	0	SD	PassiveControl	6	0	.	.
207	0	0	SD	PassiveControl	1	592.11	3.9167	0.00569
207	0	0	SD	PassiveControl	2	548.33	4.0714	0.00561
207	0	0	SD	PassiveControl	3	566.98	10.5556	0.01499
207	0	0	SD	PassiveControl	4	696.36	12.9286	0.01735
207	0	0	SD	PassiveControl	5	610.86	6.5	0.00937
207	0	0	SD	PassiveControl	6	471.17	8.7333	0.01279
208	0	0	SD	Zamzee	1	575.64	6.3056	0.0113
208	0	0	SD	Zamzee	2	341.5	11.0417	0.01652
208	0	0	SD	Zamzee	3	639.38	4.7619	0.00678
208	0	0	SD	Zamzee	4	549.62	11.1667	0.0163
208	0	0	SD	Zamzee	5	68.57	1.6667	0.00386
208	0	0	SD	Zamzee	6	379	8.4167	0.01688
212	0	1	SD	Zamzee	1	472.19	9.9167	0.01673
212	0	1	SD	Zamzee	2	422.95	11.5	0.02454
212	0	1	SD	Zamzee	3	461.1	7.8333	0.01494
212	0	1	SD	Zamzee	4	287.31	12.6667	0.03183
212	0	1	SD	Zamzee	5	411.24	7.4048	0.02938
212	0	1	SD	Zamzee	6	331.05	8.9167	0.0206
213	0	0	SD	Zamzee	1	380.5	6.5333	0.01028
213	0	0	SD	Zamzee	2	235.67	6.1389	0.02335
213	0	0	SD	Zamzee	3	144.83	1.875	0.00416
213	0	0	SD	Zamzee	4	169.02	5.6667	0.00968
213	0	0	SD	Zamzee	5	442.24	20.4333	0.03221
213	0	0	SD	Zamzee	6	169.88	17.5	0.0298
214	1	0	SD	PassiveControl	1	468.81	5.0833	0.01284
214	1	0	SD	PassiveControl	2	290.05	18.3889	0.02941
214	1	0	SD	PassiveControl	3	0	.	.
214	1	0	SD	PassiveControl	4	0	.	.
214	1	0	SD	PassiveControl	5	0	.	.
214	1	0	SD	PassiveControl	6	0	.	.
215	1	0	SD	PassiveControl	1	283.14	6.9444	0.01168
215	1	0	SD	PassiveControl	2	0	.	.
215	1	0	SD	PassiveControl	3	428.79	6.8333	0.00844
215	1	0	SD	PassiveControl	4	221.98	3.5556	0.00571
215	1	0	SD	PassiveControl	5	93.64	1.5	0.00229
215	1	0	SD	PassiveControl	6	574.26	9.8	0.01204
216	0	0	SD	PassiveControl	1	321.03	0.1	0.00017
216	0	0	SD	PassiveControl	2	460.95	0.0952	0.00017
216	0	0	SD	PassiveControl	3	603.88	0.3571	0.00052
216	0	0	SD	PassiveControl	4	497.38	3	0.00484
216	0	0	SD	PassiveControl	5	754.98	16.0476	0.0202
216	0	0	SD	PassiveControl	6	411.83	11.875	0.0202
217	0	0	SD	Zamzee	1	0	.	.
217	0	0	SD	Zamzee	2	0	.	.
217	0	0	SD	Zamzee	3	8.64	0	0
217	0	0	SD	Zamzee	4	496.4	14.6905	0.04464
217	0	0	SD	Zamzee	5	653.67	32.2381	0.04462
217	0	0	SD	Zamzee	6	450.36	14.7222	0.02704
218	1	0	SD	DDRActiveControl	1	450.28	6.25	0.01192
218	1	0	SD	DDRActiveControl	2	110.55	1.0833	0.00149
218	1	0	SD	DDRActiveControl	3	377.33	5.9583	0.00816
218	1	0	SD	DDRActiveControl	4	9.74	0	0
218	1	0	SD	DDRActiveControl	5	0	.	.
218	1	0	SD	DDRActiveControl	6	0	.	.
219	1	0	SD	DDRActiveControl	1	0	.	.
219	1	0	SD	DDRActiveControl	2	0	.	.
219	1	0	SD	DDRActiveControl	3	0	.	.
219	1	0	SD	DDRActiveControl	4	0	.	.
219	1	0	SD	DDRActiveControl	5	0	.	.
219	1	0	SD	DDRActiveControl	6	0	.	.
220	1	1	SD	PassiveControl	1	400.19	8.8333	0.01636
220	1	1	SD	PassiveControl	2	0	.	.
220	1	1	SD	PassiveControl	3	0	.	.
220	1	1	SD	PassiveControl	4	0	.	.
220	1	1	SD	PassiveControl	5	0	.	.
220	1	1	SD	PassiveControl	6	0	.	.
221	0	1	SD	PassiveControl	1	664.33	3.8056	0.00587
221	0	1	SD	PassiveControl	2	276.05	2.2	0.00408
221	0	1	SD	PassiveControl	3	445.4	8.1333	0.01601
221	0	1	SD	PassiveControl	4	0	.	.
221	0	1	SD	PassiveControl	5	0	.	.
221	0	1	SD	PassiveControl	6	0	.	.
222	0	0	SD	DDRActiveControl	1	0	.	.
222	0	0	SD	DDRActiveControl	2	0	.	.
222	0	0	SD	DDRActiveControl	3	114.1	5.25	0.01082
222	0	0	SD	DDRActiveControl	4	167.71	2.2667	0.00466
222	0	0	SD	DDRActiveControl	5	224.74	4.5833	0.00904
222	0	0	SD	DDRActiveControl	6	150.21	5.4167	0.01078
223	1	0	SD	Zamzee	1	262.28	10.375	0.04968
223	1	0	SD	Zamzee	2	0	.	.
223	1	0	SD	Zamzee	3	0	.	.
223	1	0	SD	Zamzee	4	222.07	5.4583	0.00986
223	1	0	SD	Zamzee	5	218.83	6	0.02078
223	1	0	SD	Zamzee	6	0	.	.
224	1	0	SD	DDRActiveControl	1	550.47	7.9722	0.01267
224	1	0	SD	DDRActiveControl	2	592.38	9.7381	0.01606
224	1	0	SD	DDRActiveControl	3	381.17	3.9762	0.00673
224	1	0	SD	DDRActiveControl	4	32.57	1.0833	0.01104
224	1	0	SD	DDRActiveControl	5	521.4	4.381	0.00861
224	1	0	SD	DDRActiveControl	6	468.07	5.1905	0.0093
227	0	1	SD	DDRActiveControl	1	797.08	17.3611	0.02168
227	0	1	SD	DDRActiveControl	2	706.14	13.6944	0.01666
227	0	1	SD	DDRActiveControl	3	468.45	17.6667	0.02201
227	0	1	SD	DDRActiveControl	4	0	.	.
227	0	1	SD	DDRActiveControl	5	0	.	.
227	0	1	SD	DDRActiveControl	6	0	.	.
231	1	0	SD	Zamzee	1	247.92	5.4167	0.01255
231	1	0	SD	Zamzee	2	234.02	7.6667	0.0142
231	1	0	SD	Zamzee	3	356.67	10.2778	0.01824
231	1	0	SD	Zamzee	4	207.31	11	0.02229
231	1	0	SD	Zamzee	5	144.48	8.8889	0.01794
231	1	0	SD	Zamzee	6	253.14	13.9583	0.03186
233	1	0	SD	PassiveControl	1	444.81	10.1333	0.01872
233	1	0	SD	PassiveControl	2	345.76	9.1	0.01516
233	1	0	SD	PassiveControl	3	399.29	8.0833	0.01165
233	1	0	SD	PassiveControl	4	249.24	6.9167	0.01404
233	1	0	SD	PassiveControl	5	122.02	3.5	0.00592
233	1	0	SD	PassiveControl	6	97.79	5.4444	0.01321
234	1	0	SD	DDRActiveControl	1	94.86	1.3333	0.00359
234	1	0	SD	DDRActiveControl	2	0	.	.
234	1	0	SD	DDRActiveControl	3	0	.	.
234	1	0	SD	DDRActiveControl	4	0	.	.
234	1	0	SD	DDRActiveControl	5	0	.	.
234	1	0	SD	DDRActiveControl	6	0	.	.
235	0	1	SD	Zamzee	1	363.22	3.2222	0.00443
235	0	1	SD	Zamzee	2	673.57	14.2619	0.02028
235	0	1	SD	Zamzee	3	684.62	10.6667	0.01859
235	0	1	SD	Zamzee	4	569.57	14.4167	0.02083
235	0	1	SD	Zamzee	5	716.81	18.5238	0.02427
235	0	1	SD	Zamzee	6	621.52	24.0556	0.03435
236	1	0	SD	Zamzee	1	585.44	11.4167	0.02403
236	1	0	SD	Zamzee	2	514.4	8.9524	0.01445
236	1	0	SD	Zamzee	3	328.48	8.0833	0.0125
236	1	0	SD	Zamzee	4	209.71	14.5	0.01833
236	1	0	SD	Zamzee	5	213.62	9.8333	0.01329
236	1	0	SD	Zamzee	6	0	.	.
238	1	0	SD	Zamzee	1	509.89	7.7222	0.018
238	1	0	SD	Zamzee	2	304.67	5.9167	0.0072
238	1	0	SD	Zamzee	3	405.31	1.4667	0.00216
238	1	0	SD	Zamzee	4	229.71	2.1667	0.03029
238	1	0	SD	Zamzee	5	302.9	0.6944	0.00105
238	1	0	SD	Zamzee	6	281.83	0.8333	0.00107
240	1	0	SD	PassiveControl	1	180.81	1.8333	0.00911
240	1	0	SD	PassiveControl	2	228.86	3.3333	0.00443
240	1	0	SD	PassiveControl	3	185.98	2.1667	0.00469
240	1	0	SD	PassiveControl	4	181	1.625	0.00405
240	1	0	SD	PassiveControl	5	313.14	5.2778	0.0077
240	1	0	SD	PassiveControl	6	308	3.1667	0.00435
241	1	0	SD	PassiveControl	1	372	2.0833	0.00259
241	1	0	SD	PassiveControl	2	188.29	1.75	0.00251
241	1	0	SD	PassiveControl	3	0	.	.
241	1	0	SD	PassiveControl	4	0	.	.
241	1	0	SD	PassiveControl	5	0	.	.
241	1	0	SD	PassiveControl	6	0	.	.
243	1	0	SD	DDRActiveControl	1	0	.	.
243	1	0	SD	DDRActiveControl	2	516.93	5.75	0.00786
243	1	0	SD	DDRActiveControl	3	845.43	6.6667	0.00751
243	1	0	SD	DDRActiveControl	4	811.33	9.3571	0.01104
243	1	0	SD	DDRActiveControl	5	775.14	12	0.01491
243	1	0	SD	DDRActiveControl	6	809.31	10.6429	0.01236
245	1	0	SD	DDRActiveControl	1	672.86	0.8056	0.00102
245	1	0	SD	DDRActiveControl	2	728.81	1.9286	0.00232
245	1	0	SD	DDRActiveControl	3	882.81	3.881	0.00432
245	1	0	SD	DDRActiveControl	4	869.81	5.2381	0.0055
245	1	0	SD	DDRActiveControl	5	870.48	5.2381	0.00563
245	1	0	SD	DDRActiveControl	6	906.33	5.4286	0.00567
247	0	0	SD	Zamzee	1	487.31	5.5667	0.00724
247	0	0	SD	Zamzee	2	738.19	9.1667	0.01343
247	0	0	SD	Zamzee	3	735.14	4.3333	0.00551
247	0	0	SD	Zamzee	4	383.95	4.4667	0.00603
247	0	0	SD	Zamzee	5	277.4	4.5	0.00603
247	0	0	SD	Zamzee	6	0	.	.
248	1	0	SD	DDRActiveControl	1	969.42	17.6944	0.01824
248	1	0	SD	DDRActiveControl	2	980.24	3.7857	0.00411
248	1	0	SD	DDRActiveControl	3	663.88	10.8333	0.01377
248	1	0	SD	DDRActiveControl	4	151.67	4.0556	0.00716
248	1	0	SD	DDRActiveControl	5	0	.	.
248	1	0	SD	DDRActiveControl	6	0	.	.
251	1	1	SD	PassiveControl	1	398.17	3.3889	0.00574
251	1	1	SD	PassiveControl	2	519.07	5.4762	0.01005
251	1	1	SD	PassiveControl	3	592.69	4.7143	0.00776
251	1	1	SD	PassiveControl	4	363.71	5.8056	0.01135
251	1	1	SD	PassiveControl	5	108.6	1.25	0.01426
251	1	1	SD	PassiveControl	6	653.14	3.6429	0.00513
252	1	0	SD	Zamzee	1	420.67	12.9444	0.02832
252	1	0	SD	Zamzee	2	302.31	10.3889	0.01273
252	1	0	SD	Zamzee	3	15.4	0.25	0.00339
252	1	0	SD	Zamzee	4	0	.	.
252	1	0	SD	Zamzee	5	0	.	.
252	1	0	SD	Zamzee	6	0	.	.
253	1	1	SD	Zamzee	1	671.81	4.6389	0.00669
253	1	1	SD	Zamzee	2	693.24	1.4048	0.00222
253	1	1	SD	Zamzee	3	750.98	4.9762	0.00605
253	1	1	SD	Zamzee	4	732.07	4.9524	0.00657
253	1	1	SD	Zamzee	5	756.17	5.5476	0.00723
253	1	1	SD	Zamzee	6	545.17	3.8667	0.00482
255	0	0	SD	DDRActiveControl	1	694.67	16.7222	0.02118
255	0	0	SD	DDRActiveControl	2	451.55	21.4667	0.02405
255	0	0	SD	DDRActiveControl	3	0	.	.
255	0	0	SD	DDRActiveControl	4	0	.	.
255	0	0	SD	DDRActiveControl	5	0	.	.
255	0	0	SD	DDRActiveControl	6	0	.	.
257	1	0	SD	PassiveControl	1	61.89	2.25	0.00631
257	1	0	SD	PassiveControl	2	0	.	.
257	1	0	SD	PassiveControl	3	0	.	.
257	1	0	SD	PassiveControl	4	0	.	.
257	1	0	SD	PassiveControl	5	0	.	.
257	1	0	SD	PassiveControl	6	0	.	.
259	1	0	SD	DDRActiveControl	1	0	.	.
259	1	0	SD	DDRActiveControl	2	0	.	.
259	1	0	SD	DDRActiveControl	3	0	.	.
259	1	0	SD	DDRActiveControl	4	0	.	.
259	1	0	SD	DDRActiveControl	5	338.36	1.6667	0.00233
259	1	0	SD	DDRActiveControl	6	156.48	0.5	0.00063
262	1	1	SD	DDRActiveControl	1	0	.	.
262	1	1	SD	DDRActiveControl	2	0	.	.
262	1	1	SD	DDRActiveControl	3	0	.	.
262	1	1	SD	DDRActiveControl	4	403.43	2.3571	0.00371
262	1	1	SD	DDRActiveControl	5	185.88	2.7778	0.0066
262	1	1	SD	DDRActiveControl	6	0	.	.
265	0	0	SD	PassiveControl	1	250.42	10.4583	0.02003
265	0	0	SD	PassiveControl	2	66.4	8.5	0.01829
265	0	0	SD	PassiveControl	3	0	.	.
265	0	0	SD	PassiveControl	4	0	.	.
265	0	0	SD	PassiveControl	5	0	.	.
265	0	0	SD	PassiveControl	6	0	.	.
266	0	0	SD	DDRActiveControl	1	361.47	10.2667	0.02324
266	0	0	SD	DDRActiveControl	2	404.67	14.5333	0.02288
266	0	0	SD	DDRActiveControl	3	455.71	11.0278	0.01516
266	0	0	SD	DDRActiveControl	4	0	.	.
266	0	0	SD	DDRActiveControl	5	0	.	.
266	0	0	SD	DDRActiveControl	6	0	.	.
267	0	0	SD	DDRActiveControl	1	413.58	6.3611	0.01572
267	0	0	SD	DDRActiveControl	2	310.07	3.7	0.00752
267	0	0	SD	DDRActiveControl	3	10.55	0	0
267	0	0	SD	DDRActiveControl	4	302.14	4.5667	0.01081
267	0	0	SD	DDRActiveControl	5	0	.	.
267	0	0	SD	DDRActiveControl	6	225.93	3.9	0.00612
269	1	1	SD	PassiveControl	1	320.81	8.4583	0.01152
269	1	1	SD	PassiveControl	2	247.76	7.375	0.02956
269	1	1	SD	PassiveControl	3	235.62	4.3667	0.01503
269	1	1	SD	PassiveControl	4	193.21	3.3333	0.00951
269	1	1	SD	PassiveControl	5	0	.	.
269	1	1	SD	PassiveControl	6	77.74	14.6667	0.02695
270	1	0	SD	DDRActiveControl	1	247.5	3.5556	0.00578
270	1	0	SD	DDRActiveControl	2	0	.	.
270	1	0	SD	DDRActiveControl	3	1.95	0	0
270	1	0	SD	DDRActiveControl	4	0	.	.
270	1	0	SD	DDRActiveControl	5	0	.	.
270	1	0	SD	DDRActiveControl	6	0	.	.
272	0	0	SD	Zamzee	1	498.89	10.4444	0.02683
272	0	0	SD	Zamzee	2	226.5	16.1667	0.04976
272	0	0	SD	Zamzee	3	387.38	16.7	0.03049
272	0	0	SD	Zamzee	4	367.95	9.4722	0.02301
272	0	0	SD	Zamzee	5	411.95	14.1	0.02348
272	0	0	SD	Zamzee	6	457.31	17.9444	0.03084
274	1	0	SD	Zamzee	1	389.53	4.3	0.00988
274	1	0	SD	Zamzee	2	120.95	5.6667	0.0175
274	1	0	SD	Zamzee	3	114.57	13.3333	0.01663
274	1	0	SD	Zamzee	4	0	.	.
274	1	0	SD	Zamzee	5	175.12	6	0.0127
274	1	0	SD	Zamzee	6	399.6	5.6111	0.01239
276	0	0	SD	PassiveControl	1	396.67	4	0.00735
276	0	0	SD	PassiveControl	2	353.9	6.0667	0.00976
276	0	0	SD	PassiveControl	3	316.79	1.6389	0.00373
276	0	0	SD	PassiveControl	4	336.4	9.6333	0.02139
276	0	0	SD	PassiveControl	5	283.88	9.5833	0.01995
276	0	0	SD	PassiveControl	6	0	.	.
278	1	0	SD	PassiveControl	1	722.64	10.6944	0.01677
278	1	0	SD	PassiveControl	2	0	.	.
278	1	0	SD	PassiveControl	3	0	.	.
278	1	0	SD	PassiveControl	4	0	.	.
278	1	0	SD	PassiveControl	5	0	.	.
278	1	0	SD	PassiveControl	6	0	.	.
279	0	0	SD	DDRActiveControl	1	0	.	.
279	0	0	SD	DDRActiveControl	2	34.43	18.25	0.17671
279	0	0	SD	DDRActiveControl	3	468.57	13.0238	0.02376
279	0	0	SD	DDRActiveControl	4	497.17	16.9444	0.02721
279	0	0	SD	DDRActiveControl	5	238.48	24.6111	0.04386
279	0	0	SD	DDRActiveControl	6	0	.	.
281	1	0	SD	Zamzee	1	551.75	11.7	0.01527
281	1	0	SD	Zamzee	2	211.43	6.5417	0.00988
281	1	0	SD	Zamzee	3	0	.	.
281	1	0	SD	Zamzee	4	0	.	.
281	1	0	SD	Zamzee	5	0	.	.
281	1	0	SD	Zamzee	6	0	.	.
283	0	1	SD	Zamzee	1	362.78	1.2	0.00326
283	0	1	SD	Zamzee	2	491.95	3.0952	0.006
283	0	1	SD	Zamzee	3	557.14	5.5714	0.00854
283	0	1	SD	Zamzee	4	246.55	2.0833	0.00605
283	0	1	SD	Zamzee	5	488.86	7.2778	0.01011
283	0	1	SD	Zamzee	6	658.64	8.6667	0.01213
284	0	1	SD	Zamzee	1	575.78	20.9444	0.02961
284	0	1	SD	Zamzee	2	761.6	8.3571	0.01068
284	0	1	SD	Zamzee	3	672.98	5.2857	0.0072
284	0	1	SD	Zamzee	4	565.55	17.3667	0.02219
284	0	1	SD	Zamzee	5	545.43	8.2778	0.01001
284	0	1	SD	Zamzee	6	473.12	8.6111	0.01529
285	1	0	SD	DDRActiveControl	1	420.11	3.8667	0.00646
285	1	0	SD	DDRActiveControl	2	269.24	7.8333	0.01172
285	1	0	SD	DDRActiveControl	3	0	.	.
285	1	0	SD	DDRActiveControl	4	0	.	.
285	1	0	SD	DDRActiveControl	5	0	.	.
285	1	0	SD	DDRActiveControl	6	0	.	.
286	0	0	SD	PassiveControl	1	613.94	6.6667	0.01183
286	0	0	SD	PassiveControl	2	580.9	25.0476	0.03003
286	0	0	SD	PassiveControl	3	696.57	16.2619	0.01892
286	0	0	SD	PassiveControl	4	699.74	35.1667	0.04235
286	0	0	SD	PassiveControl	5	635.26	20.1944	0.02096
286	0	0	SD	PassiveControl	6	803.57	25.4762	0.03012
288	1	0	SD	DDRActiveControl	1	0	.	.
288	1	0	SD	DDRActiveControl	2	3.98	0	0
288	1	0	SD	DDRActiveControl	3	0	.	.
288	1	0	SD	DDRActiveControl	4	0	.	.
288	1	0	SD	DDRActiveControl	5	0	.	.
288	1	0	SD	DDRActiveControl	6	0	.	.
289	1	1	SD	PassiveControl	1	33	0	0
289	1	1	SD	PassiveControl	2	0	.	.
289	1	1	SD	PassiveControl	3	0	.	.
289	1	1	SD	PassiveControl	4	0	.	.
289	1	1	SD	PassiveControl	5	0	.	.
289	1	1	SD	PassiveControl	6	0	.	.
290	0	0	SD	PassiveControl	1	343.94	7.3333	0.01604
290	0	0	SD	PassiveControl	2	465.88	14.3889	0.02576
290	0	0	SD	PassiveControl	3	113.21	6.25	0.01895
290	0	0	SD	PassiveControl	4	0	.	.
290	0	0	SD	PassiveControl	5	0	.	.
290	0	0	SD	PassiveControl	6	0	.	.
294	0	1	SD	PassiveControl	1	264.03	6.6667	0.01263
294	0	1	SD	PassiveControl	2	428.33	3.2619	0.00441
294	0	1	SD	PassiveControl	3	112.19	2.5	0.00573
294	0	1	SD	PassiveControl	4	0	.	.
294	0	1	SD	PassiveControl	5	37.86	0	0
294	0	1	SD	PassiveControl	6	0	.	.
296	1	0	SD	Zamzee	1	451.22	9.6389	0.01984
296	1	0	SD	Zamzee	2	0	.	.
296	1	0	SD	Zamzee	3	0	.	.
296	1	0	SD	Zamzee	4	0	.	.
296	1	0	SD	Zamzee	5	0	.	.
296	1	0	SD	Zamzee	6	0	.	.
297	0	0	SD	Zamzee	1	744.94	17	0.02077
297	0	0	SD	Zamzee	2	841.33	9.6667	0.0117
297	0	0	SD	Zamzee	3	705.26	7.7143	0.00984
297	0	0	SD	Zamzee	4	733.19	7.7143	0.0099
297	0	0	SD	Zamzee	5	710.88	6.4762	0.00789
297	0	0	SD	Zamzee	6	671.74	9.6944	0.01199
299	0	0	SD	DDRActiveControl	1	450	6.6944	0.01202
299	0	0	SD	DDRActiveControl	2	179.86	1.125	0.00243
299	0	0	SD	DDRActiveControl	3	660.14	6.2619	0.00881
299	0	0	SD	DDRActiveControl	4	677.98	10.0714	0.01213
299	0	0	SD	DDRActiveControl	5	745.48	7.881	0.01048
299	0	0	SD	DDRActiveControl	6	548.12	12.0476	0.02056
302	0	1	MV	DDRActiveControl	1	686	8.9167	0.0149
302	0	1	MV	DDRActiveControl	2	406.48	8.375	0.01068
302	0	1	MV	DDRActiveControl	3	0	.	.
302	0	1	MV	DDRActiveControl	4	0	.	.
302	0	1	MV	DDRActiveControl	5	0	.	.
302	0	1	MV	DDRActiveControl	6	0	.	.
305	0	0	MV	DDRActiveControl	1	6.19	0	0
305	0	0	MV	DDRActiveControl	2	0	.	.
305	0	0	MV	DDRActiveControl	3	0	.	.
305	0	0	MV	DDRActiveControl	4	357.24	6.6111	0.01349
305	0	0	MV	DDRActiveControl	5	255.55	6.7222	0.01546
305	0	0	MV	DDRActiveControl	6	0	.	.
306	1	0	MV	Zamzee	1	207.31	1.625	0.00519
306	1	0	MV	Zamzee	2	13.14	0	0
306	1	0	MV	Zamzee	3	0	.	.
306	1	0	MV	Zamzee	4	115.02	3.8333	0.00732
306	1	0	MV	Zamzee	5	161.6	9.3	0.11955
306	1	0	MV	Zamzee	6	462	6.4	0.01074
307	1	1	MV	Zamzee	1	300.03	19.6667	0.03433
307	1	1	MV	Zamzee	2	228.36	12	0.03395
307	1	1	MV	Zamzee	3	113.81	3.7222	0.00493
307	1	1	MV	Zamzee	4	162.02	2.3889	0.00325
307	1	1	MV	Zamzee	5	0	.	.
307	1	1	MV	Zamzee	6	0	.	.
308	1	0	MV	DDRActiveControl	1	623.67	0.9167	0.0015
308	1	0	MV	DDRActiveControl	2	621.14	0.1429	0.00018
308	1	0	MV	DDRActiveControl	3	288.81	0.3333	0.00382
308	1	0	MV	DDRActiveControl	4	496.62	1.6667	0.00219
308	1	0	MV	DDRActiveControl	5	335.05	0.9583	0.00257
308	1	0	MV	DDRActiveControl	6	518.31	2.1667	0.00315
310	0	0	MV	DDRActiveControl	1	542.61	15.1111	0.0316
310	0	0	MV	DDRActiveControl	2	550.9	14.75	0.02166
310	0	0	MV	DDRActiveControl	3	0	.	.
310	0	0	MV	DDRActiveControl	4	0	.	.
310	0	0	MV	DDRActiveControl	5	0	.	.
310	0	0	MV	DDRActiveControl	6	0	.	.
311	1	1	MV	PassiveControl	1	534.03	5.5667	0.00831
311	1	1	MV	PassiveControl	2	534.33	9.0714	0.01281
311	1	1	MV	PassiveControl	3	184.6	3.6667	0.00553
311	1	1	MV	PassiveControl	4	207.81	1.5	0.00206
311	1	1	MV	PassiveControl	5	100.79	0.4167	0.00067
311	1	1	MV	PassiveControl	6	5.12	0	0
312	0	1	MV	PassiveControl	1	471.44	1.1667	0.00197
312	0	1	MV	PassiveControl	2	206.74	1.9167	0.0031
312	0	1	MV	PassiveControl	3	0	.	.
312	0	1	MV	PassiveControl	4	0	.	.
312	0	1	MV	PassiveControl	5	0	.	.
312	0	1	MV	PassiveControl	6	0	.	.
314	0	0	MV	DDRActiveControl	1	0	.	.
314	0	0	MV	DDRActiveControl	2	0	.	.
314	0	0	MV	DDRActiveControl	3	0	.	.
314	0	0	MV	DDRActiveControl	4	0	.	.
314	0	0	MV	DDRActiveControl	5	0	.	.
314	0	0	MV	DDRActiveControl	6	0	.	.
315	0	1	MV	PassiveControl	1	406.81	1.0278	0.00188
315	0	1	MV	PassiveControl	2	245.33	0.5833	0.00085
315	0	1	MV	PassiveControl	3	9.29	0	0
315	0	1	MV	PassiveControl	4	0	.	.
315	0	1	MV	PassiveControl	5	0	.	.
315	0	1	MV	PassiveControl	6	0	.	.
317	0	1	MV	PassiveControl	1	506.03	4.6667	0.00922
317	0	1	MV	PassiveControl	2	282.9	7.2	0.01547
317	0	1	MV	PassiveControl	3	0	.	.
317	0	1	MV	PassiveControl	4	78.95	2	0.00362
317	0	1	MV	PassiveControl	5	78.1	0.3333	0.00061
317	0	1	MV	PassiveControl	6	0	.	.
320	1	0	MV	Zamzee	1	531.36	4.9722	0.00843
320	1	0	MV	Zamzee	2	269.45	7.2083	0.01092
320	1	0	MV	Zamzee	3	454.43	5.3889	0.00773
320	1	0	MV	Zamzee	4	456.9	8.1333	0.01191
320	1	0	MV	Zamzee	5	0	.	.
320	1	0	MV	Zamzee	6	0	.	.
321	1	0	MV	Zamzee	1	0	.	.
321	1	0	MV	Zamzee	2	0	.	.
321	1	0	MV	Zamzee	3	0	.	.
321	1	0	MV	Zamzee	4	0	.	.
321	1	0	MV	Zamzee	5	0	.	.
321	1	0	MV	Zamzee	6	0	.	.
322	1	0	MV	DDRActiveControl	1	616.25	11.6389	0.02343
322	1	0	MV	DDRActiveControl	2	570.26	18.0833	0.02415
322	1	0	MV	DDRActiveControl	3	460.69	7.2778	0.01326
322	1	0	MV	DDRActiveControl	4	152.74	8.1667	0.01159
322	1	0	MV	DDRActiveControl	5	228.38	8	0.02904
322	1	0	MV	DDRActiveControl	6	249.76	6.5	0.01202
323	0	1	MV	PassiveControl	1	459.47	11.2778	0.02097
323	0	1	MV	PassiveControl	2	295.9	14.4	0.02854
323	0	1	MV	PassiveControl	3	0	.	.
323	0	1	MV	PassiveControl	4	0	.	.
323	0	1	MV	PassiveControl	5	0	.	.
323	0	1	MV	PassiveControl	6	0	.	.
324	1	1	MV	DDRActiveControl	1	550.64	8.6944	0.01568
324	1	1	MV	DDRActiveControl	2	615.98	7.5476	0.01104
324	1	1	MV	DDRActiveControl	3	338.31	7.8333	0.0098
324	1	1	MV	DDRActiveControl	4	543.48	4.8571	0.00868
324	1	1	MV	DDRActiveControl	5	193.83	2.7222	0.00796
324	1	1	MV	DDRActiveControl	6	7.1	0	0
328	0	0	MV	PassiveControl	1	698.94	1.8889	0.00245
328	0	0	MV	PassiveControl	2	797.52	11.9048	0.01493
328	0	0	MV	PassiveControl	3	467.86	6.25	0.00736
328	0	0	MV	PassiveControl	4	419	1.2	0.00895
328	0	0	MV	PassiveControl	5	0	.	.
328	0	0	MV	PassiveControl	6	0	.	.
330	1	0	MV	PassiveControl	1	0	.	.
330	1	0	MV	PassiveControl	2	0	.	.
330	1	0	MV	PassiveControl	3	0	.	.
330	1	0	MV	PassiveControl	4	0	.	.
330	1	0	MV	PassiveControl	5	0	.	.
330	1	0	MV	PassiveControl	6	0	.	.
331	0	0	MV	DDRActiveControl	1	157.08	0.1944	0.00083
331	0	0	MV	DDRActiveControl	2	218.17	0.2143	0.00089
331	0	0	MV	DDRActiveControl	3	105.38	8.5	0.01152
331	0	0	MV	DDRActiveControl	4	0	.	.
331	0	0	MV	DDRActiveControl	5	58.67	0	0
331	0	0	MV	DDRActiveControl	6	230.02	1.1429	0.00306
333	0	1	MV	DDRActiveControl	1	262.33	4.3667	0.01087
333	0	1	MV	DDRActiveControl	2	84.02	2.1667	0.00368
333	0	1	MV	DDRActiveControl	3	0	.	.
333	0	1	MV	DDRActiveControl	4	0	.	.
333	0	1	MV	DDRActiveControl	5	0	.	.
333	0	1	MV	DDRActiveControl	6	0	.	.
334	0	0	MV	PassiveControl	1	8.36	0.3333	0.00948
334	0	0	MV	PassiveControl	2	0	.	.
334	0	0	MV	PassiveControl	3	0	.	.
334	0	0	MV	PassiveControl	4	7.07	0	0
334	0	0	MV	PassiveControl	5	0	.	.
334	0	0	MV	PassiveControl	6	0	.	.
335	1	0	MV	Zamzee	1	531.5	6.2222	0.01093
335	1	0	MV	Zamzee	2	623.5	5.9524	0.00947
335	1	0	MV	Zamzee	3	584.5	4.0714	0.00718
335	1	0	MV	Zamzee	4	668.19	9.8095	0.01428
335	1	0	MV	Zamzee	5	650.86	12.0952	0.02042
335	1	0	MV	Zamzee	6	639.14	5.4048	0.00836
338	0	0	MV	PassiveControl	1	421.72	6.6667	0.00995
338	0	0	MV	PassiveControl	2	53.62	8.6667	0.02309
338	0	0	MV	PassiveControl	3	0	.	.
338	0	0	MV	PassiveControl	4	0	.	.
338	0	0	MV	PassiveControl	5	0	.	.
338	0	0	MV	PassiveControl	6	0	.	.
341	0	0	MV	PassiveControl	1	873.92	14.5278	0.01671
341	0	0	MV	PassiveControl	2	690.14	6.8333	0.00877
341	0	0	MV	PassiveControl	3	477.07	4.4	0.00529
341	0	0	MV	PassiveControl	4	819.67	5.5238	0.00603
341	0	0	MV	PassiveControl	5	609.69	7.8611	0.01124
341	0	0	MV	PassiveControl	6	0	.	.
343	0	0	MV	DDRActiveControl	1	510.97	6.2222	0.0162
343	0	0	MV	DDRActiveControl	2	704.52	9.8571	0.0157
343	0	0	MV	DDRActiveControl	3	430.21	6.3333	0.01268
343	0	0	MV	DDRActiveControl	4	8.4	0	0
343	0	0	MV	DDRActiveControl	5	474.14	6.8611	0.00886
343	0	0	MV	DDRActiveControl	6	0	.	.
344	1	0	MV	Zamzee	1	425.94	15.4444	0.06507
344	1	0	MV	Zamzee	2	628.88	11.5476	0.01885
344	1	0	MV	Zamzee	3	574.86	14.7222	0.03344
344	1	0	MV	Zamzee	4	297.36	16.3333	0.02757
344	1	0	MV	Zamzee	5	0	.	.
344	1	0	MV	Zamzee	6	0	.	.
345	1	0	MV	DDRActiveControl	1	540.17	4.5556	0.00761
345	1	0	MV	DDRActiveControl	2	584.93	5.2381	0.0095
345	1	0	MV	DDRActiveControl	3	563.52	4.6429	0.01028
345	1	0	MV	DDRActiveControl	4	701.79	5.3095	0.00777
345	1	0	MV	DDRActiveControl	5	616.93	2.0952	0.00349
345	1	0	MV	DDRActiveControl	6	268.93	5.4444	0.0085
346	1	0	MV	Zamzee	1	377.69	10.6389	0.01745
346	1	0	MV	Zamzee	2	356.5	7.0476	0.01675
346	1	0	MV	Zamzee	3	183.38	26.6111	0.06583
346	1	0	MV	Zamzee	4	191.38	3.2778	0.01016
346	1	0	MV	Zamzee	5	514.95	7.6905	0.01619
346	1	0	MV	Zamzee	6	232.74	6.6111	0.01162
349	0	0	MV	DDRActiveControl	1	532.19	6.1389	0.00897
349	0	0	MV	DDRActiveControl	2	45.52	0.6667	0.00209
349	0	0	MV	DDRActiveControl	3	0	.	.
349	0	0	MV	DDRActiveControl	4	0	.	.
349	0	0	MV	DDRActiveControl	5	0	.	.
349	0	0	MV	DDRActiveControl	6	0	.	.
350	0	0	MV	DDRActiveControl	1	551.25	13.0333	0.01853
350	0	0	MV	DDRActiveControl	2	374.31	12.8	0.01594
350	0	0	MV	DDRActiveControl	3	0	.	.
350	0	0	MV	DDRActiveControl	4	0	.	.
350	0	0	MV	DDRActiveControl	5	0	.	.
350	0	0	MV	DDRActiveControl	6	0	.	.
352	0	0	MV	Zamzee	1	538.17	0.25	0.00046
352	0	0	MV	Zamzee	2	600.71	0.0952	0.00016
352	0	0	MV	Zamzee	3	422.69	3.0833	0.00408
352	0	0	MV	Zamzee	4	475.69	6.0833	0.00853
352	0	0	MV	Zamzee	5	4.19	0	0
352	0	0	MV	Zamzee	6	0	.	.
354	0	1	MV	PassiveControl	1	575.5	3.3056	0.00602
354	0	1	MV	PassiveControl	2	339.62	12.7778	0.01604
354	0	1	MV	PassiveControl	3	0	.	.
354	0	1	MV	PassiveControl	4	0	.	.
354	0	1	MV	PassiveControl	5	0	.	.
354	0	1	MV	PassiveControl	6	0	.	.
355	0	1	MV	Zamzee	1	573.75	3.6944	0.005
355	0	1	MV	Zamzee	2	411.1	5.1	0.00804
355	0	1	MV	Zamzee	3	346.21	9.5417	0.01993
355	0	1	MV	Zamzee	4	0	.	.
355	0	1	MV	Zamzee	5	0	.	.
355	0	1	MV	Zamzee	6	0	.	.
356	1	0	MV	Zamzee	1	392.81	12.7	0.03017
356	1	0	MV	Zamzee	2	0	.	.
356	1	0	MV	Zamzee	3	0	.	.
356	1	0	MV	Zamzee	4	0	.	.
356	1	0	MV	Zamzee	5	0	.	.
356	1	0	MV	Zamzee	6	0	.	.
357	0	0	MV	Zamzee	1	0	.	.
357	0	0	MV	Zamzee	2	535.64	5.4048	0.00983
357	0	0	MV	Zamzee	3	509	5.0333	0.00651
357	0	0	MV	Zamzee	4	448.76	5.4167	0.00776
357	0	0	MV	Zamzee	5	0	.	.
357	0	0	MV	Zamzee	6	0	.	.
359	0	0	MV	PassiveControl	1	807.67	8.5556	0.0107
359	0	0	MV	PassiveControl	2	782.02	6.2857	0.00738
359	0	0	MV	PassiveControl	3	766.88	5.4524	0.00618
359	0	0	MV	PassiveControl	4	877.88	5.3095	0.00586
359	0	0	MV	PassiveControl	5	900.36	7.2381	0.00831
359	0	0	MV	PassiveControl	6	907.1	7.6905	0.00847
360	1	0	MV	Zamzee	1	84	1.5	0.00308
360	1	0	MV	Zamzee	2	393.88	4.0238	0.00857
360	1	0	MV	Zamzee	3	351.71	11.3333	0.02275
360	1	0	MV	Zamzee	4	369.14	3.5	0.00696
360	1	0	MV	Zamzee	5	210.36	3.9583	0.01723
360	1	0	MV	Zamzee	6	287.02	2.5556	0.00584
362	0	0	MV	Zamzee	1	0	.	.
362	0	0	MV	Zamzee	2	0	.	.
362	0	0	MV	Zamzee	3	0	.	.
362	0	0	MV	Zamzee	4	0	.	.
362	0	0	MV	Zamzee	5	0	.	.
362	0	0	MV	Zamzee	6	0	.	.
363	1	0	MV	Zamzee	1	149.75	9.5	0.0188
363	1	0	MV	Zamzee	2	27.67	8.1667	0.04217
363	1	0	MV	Zamzee	3	201.55	20.6667	0.02909
363	1	0	MV	Zamzee	4	73.9	3.1667	0.00612
363	1	0	MV	Zamzee	5	471.12	2.8333	0.00424
363	1	0	MV	Zamzee	6	559.55	5.4444	0.00805
364	0	0	MV	Zamzee	1	617.03	12.75	0.02292
364	0	0	MV	Zamzee	2	651.76	11.9286	0.01551
364	0	0	MV	Zamzee	3	448.45	10.1667	0.01533
364	0	0	MV	Zamzee	4	791.07	15.7857	0.02014
364	0	0	MV	Zamzee	5	223.02	15.8333	0.01933
364	0	0	MV	Zamzee	6	0	.	.
365	0	0	MV	DDRActiveControl	1	578.78	0.4722	0.00083
365	0	0	MV	DDRActiveControl	2	710.45	2.8095	0.00375
365	0	0	MV	DDRActiveControl	3	667.64	2.4286	0.00334
365	0	0	MV	DDRActiveControl	4	713.98	4.8333	0.00652
365	0	0	MV	DDRActiveControl	5	535.6	1.7143	0.00316
365	0	0	MV	DDRActiveControl	6	689.19	0.5476	0.00084
366	0	0	MV	Zamzee	1	638.47	0.3667	0.00046
366	0	0	MV	Zamzee	2	532.64	0.6667	0.00101
366	0	0	MV	Zamzee	3	512.88	0.3571	0.00052
366	0	0	MV	Zamzee	4	26.9	1.6667	0.00885
366	0	0	MV	Zamzee	5	434.29	0.25	0.00038
366	0	0	MV	Zamzee	6	539.02	0.4762	0.00072
367	0	0	MV	PassiveControl	1	511.75	17.3611	0.0298
367	0	0	MV	PassiveControl	2	158.98	2.5417	0.00575
367	0	0	MV	PassiveControl	3	37.07	0.0333	0.00043
367	0	0	MV	PassiveControl	4	83.76	1	0.00171
367	0	0	MV	PassiveControl	5	0	.	.
367	0	0	MV	PassiveControl	6	155.45	4.8333	0.00878
369	1	0	MV	DDRActiveControl	1	709.67	10.3333	0.01492
369	1	0	MV	DDRActiveControl	2	466.19	14.8667	0.02481
369	1	0	MV	DDRActiveControl	3	205.31	3.3889	0.00618
369	1	0	MV	DDRActiveControl	4	100.98	4.5	0.00637
369	1	0	MV	DDRActiveControl	5	0	.	.
369	1	0	MV	DDRActiveControl	6	0	.	.
376	0	0	MV	PassiveControl	1	315.19	5.5	0.01436
376	0	0	MV	PassiveControl	2	50.1	0	0
376	0	0	MV	PassiveControl	3	0	.	.
376	0	0	MV	PassiveControl	4	13.26	0	0
376	0	0	MV	PassiveControl	5	0	.	.
376	0	0	MV	PassiveControl	6	82.69	0.8333	0.00147
377	0	1	MV	Zamzee	1	581.22	36.5	0.0843
377	0	1	MV	Zamzee	2	863.83	32.619	0.0441
377	0	1	MV	Zamzee	3	205.71	22.9167	0.03227
377	0	1	MV	Zamzee	4	0	.	.
377	0	1	MV	Zamzee	5	0	.	.
377	0	1	MV	Zamzee	6	0	.	.
378	0	0	MV	DDRActiveControl	1	496.89	2.4333	0.00314
378	0	0	MV	DDRActiveControl	2	121.38	1.6667	0.00338
378	0	0	MV	DDRActiveControl	3	0	.	.
378	0	0	MV	DDRActiveControl	4	0	.	.
378	0	0	MV	DDRActiveControl	5	0	.	.
378	0	0	MV	DDRActiveControl	6	0	.	.
379	1	0	MV	DDRActiveControl	1	690.47	7.1389	0.0113
379	1	0	MV	DDRActiveControl	2	743.69	4.7381	0.00633
379	1	0	MV	DDRActiveControl	3	757.79	8.2143	0.01114
379	1	0	MV	DDRActiveControl	4	744.79	11.1667	0.01554
379	1	0	MV	DDRActiveControl	5	762.88	7.1667	0.00899
379	1	0	MV	DDRActiveControl	6	799.71	6.7143	0.008
381	0	0	MV	PassiveControl	1	0	.	.
381	0	0	MV	PassiveControl	2	0	.	.
381	0	0	MV	PassiveControl	3	0	.	.
381	0	0	MV	PassiveControl	4	0	.	.
381	0	0	MV	PassiveControl	5	117.33	0.9167	0.00245
381	0	0	MV	PassiveControl	6	445.31	2.8333	0.00374
382	0	0	MV	Zamzee	1	924.31	5.1667	0.00646
382	0	0	MV	Zamzee	2	819.29	6.0714	0.00732
382	0	0	MV	Zamzee	3	621.17	3.5278	0.00483
382	0	0	MV	Zamzee	4	419.88	8	0.01902
382	0	0	MV	Zamzee	5	405.48	6.619	0.01026
382	0	0	MV	Zamzee	6	5.14	0.3333	0.00926
383	0	0	MV	Zamzee	1	419.58	10.1944	0.01889
383	0	0	MV	Zamzee	2	83.74	0.0417	0.00022
383	0	0	MV	Zamzee	3	0	.	.
383	0	0	MV	Zamzee	4	0	.	.
383	0	0	MV	Zamzee	5	0	.	.
383	0	0	MV	Zamzee	6	0	.	.
384	0	0	MV	DDRActiveControl	1	514.33	14.1389	0.02226
384	0	0	MV	DDRActiveControl	2	578.12	30.1667	0.04582
384	0	0	MV	DDRActiveControl	3	555.93	24.9762	0.0453
384	0	0	MV	DDRActiveControl	4	208.57	48.25	0.06611
384	0	0	MV	DDRActiveControl	5	0	.	.
384	0	0	MV	DDRActiveControl	6	0	.	.
386	0	0	MV	DDRActiveControl	1	652.22	8.5556	0.01241
386	0	0	MV	DDRActiveControl	2	730.52	13.4286	0.01487
386	0	0	MV	DDRActiveControl	3	394.31	7.6333	0.01284
386	0	0	MV	DDRActiveControl	4	554.69	9.8611	0.01098
386	0	0	MV	DDRActiveControl	5	735.98	9.4286	0.01213
386	0	0	MV	DDRActiveControl	6	430.67	4.5278	0.00661
387	1	0	MV	Zamzee	1	298.39	13.9667	0.03092
387	1	0	MV	Zamzee	2	422.83	2.0476	0.00884
387	1	0	MV	Zamzee	3	699.14	5.8095	0.00737
387	1	0	MV	Zamzee	4	625.12	6.119	0.01029
387	1	0	MV	Zamzee	5	700.76	7.4524	0.01036
387	1	0	MV	Zamzee	6	565.4	2.7778	0.00451
388	1	0	MV	Zamzee	1	495.19	14.9667	0.02312
388	1	0	MV	Zamzee	2	173.14	9.1667	0.01311
388	1	0	MV	Zamzee	3	817.19	7.0238	0.00826
388	1	0	MV	Zamzee	4	772.38	11.4524	0.0155
388	1	0	MV	Zamzee	5	688.26	4.9048	0.00694
388	1	0	MV	Zamzee	6	806.38	11.8333	0.01449
392	1	1	MV	DDRActiveControl	1	29.89	0.1667	0.00121
392	1	1	MV	DDRActiveControl	2	0	.	.
392	1	1	MV	DDRActiveControl	3	0	.	.
392	1	1	MV	DDRActiveControl	4	17.79	0.25	0.00232
392	1	1	MV	DDRActiveControl	5	0	.	.
392	1	1	MV	DDRActiveControl	6	0	.	.
393	0	1	MV	PassiveControl	1	59.92	4.1667	0.01159
393	0	1	MV	PassiveControl	2	259.43	26.1111	0.04049
393	0	1	MV	PassiveControl	3	0	.	.
393	0	1	MV	PassiveControl	4	0	.	.
393	0	1	MV	PassiveControl	5	0	.	.
393	0	1	MV	PassiveControl	6	0	.	.
394	0	1	MV	PassiveControl	1	840.17	14	0.0157
394	0	1	MV	PassiveControl	2	778.29	9.9762	0.01234
394	0	1	MV	PassiveControl	3	821.43	8.2857	0.00968
394	0	1	MV	PassiveControl	4	691.36	19.3056	0.02365
394	0	1	MV	PassiveControl	5	870.4	17.8571	0.02112
394	0	1	MV	PassiveControl	6	643.26	12.9286	0.01868
396	1	0	MV	PassiveControl	1	0	.	.
396	1	0	MV	PassiveControl	2	0	.	.
396	1	0	MV	PassiveControl	3	0	.	.
396	1	0	MV	PassiveControl	4	0	.	.
396	1	0	MV	PassiveControl	5	0	.	.
396	1	0	MV	PassiveControl	6	0	.	.
397	0	0	MV	PassiveControl	1	503	2.3333	0.00407
397	0	0	MV	PassiveControl	2	316.31	7.5417	0.01132
397	0	0	MV	PassiveControl	3	7.69	0.1667	0.0069
397	0	0	MV	PassiveControl	4	0	.	.
397	0	0	MV	PassiveControl	5	0	.	.
397	0	0	MV	PassiveControl	6	0	.	.
398	1	1	MV	DDRActiveControl	1	393.72	3.5417	0.00846
398	1	1	MV	DDRActiveControl	2	138.29	6	0.01246
398	1	1	MV	DDRActiveControl	3	0	.	.
398	1	1	MV	DDRActiveControl	4	0	.	.
398	1	1	MV	DDRActiveControl	5	0	.	.
398	1	1	MV	DDRActiveControl	6	0	.	.
